# Supplementary material for: Extraosseous Ewing Sarcoma in Children: A Systematic Review and Meta-Analysis of Clinicodemographic Characteristics
Source: MDPI journal article supplement (doi:10.3390/children9121859), 2022-11-29
Supplement: s1 [file s1]

**Table S1.** the detailed search strategy employed in each electronic database.

| Database                                | No.                            | Search Query                                                                                                                                                                      | Results  |
|-----------------------------------------|--------------------------------|-----------------------------------------------------------------------------------------------------------------------------------------------------------------------------------|----------|
| <b>PubMed [August 24, 2022]</b>         |                                |                                                                                                                                                                                   |          |
|                                         | #1                             | "Ewing sarcoma" OR "Ewing's sarcoma" OR "Ewing family of tumors" OR "Ewing tumor" OR "Sarcoma, Ewing"[Mesh]                                                                       | 11048    |
|                                         | #2                             | Adolescen* OR Child* OR "Young adult*" OR Pediatric* OR Paediatric* OR "Pediatrics"[Mesh] OR "Adolescent"[Mesh] OR "Child"[Mesh] OR "Young Adult"[Mesh] OR "Adult Children"[Mesh] | 5015527  |
|                                         | #3                             | "soft tissue" OR extraskeletal OR extra-skeletal OR extraosseous OR extra-osseous OR "Soft Tissue Neoplasms"[Mesh] OR "Neoplasms, Connective and Soft Tissue"[Mesh]               | 373630   |
|                                         | #4                             | Clinicopathologic* OR "clinical feature*" OR "clinical characteristic*" OR "clinical outcome*" OR "clinical presentation"                                                         | 584569   |
|                                         | #5                             | #1 AND #2 AND #3 AND #4                                                                                                                                                           | 404      |
| <b>Scopus [August 24, 2022]</b>         |                                |                                                                                                                                                                                   |          |
|                                         | #1                             | ALL ("Ewing sarcoma") OR ALL ("Ewing's sarcoma") OR ALL ("Ewing family of tumors") OR ALL ("Ewing tumor")                                                                         | 44723    |
|                                         | #2                             | ALL (Adolescen*) OR ALL (Child*) OR ALL ("Young adult*") OR ALL (Pediatric*) OR ALL (Paediatric*)                                                                                 | 10971188 |
|                                         | #3                             | ALL ("soft tissue") OR ALL (extraskeletal) OR ALL (extra-skeletal) OR ALL (extraosseous) OR ALL (extra-osseous)                                                                   | 545307   |
|                                         | #4                             | ALL (Clinicopathologic*) OR ALL ("clinical feature*") OR ALL ("clinical characteristic*") OR ALL ("clinical outcome*") OR ALL ("clinical presentation")                           | 3057044  |
|                                         | #5                             | #1 AND #2 AND #3 AND #4                                                                                                                                                           | 1883     |
| <b>Web of Science [August 24, 2022]</b> |                                |                                                                                                                                                                                   |          |
|                                         | #1                             | ALL="Ewing sarcoma" OR ALL="Ewing's sarcoma" OR ALL="Ewing family of tumors" OR ALL="Ewing tumor"                                                                                 | 9388     |
|                                         | #2                             | ALL=Adolescen* OR ALL=Child* OR ALL="Young adult*" OR ALL=Pediatric* OR ALL=Paediatric*                                                                                           | 4134918  |
|                                         | #3                             | ALL="soft tissue" OR ALL=extraskeletal OR ALL=extra-skeletal OR ALL=extraosseous OR ALL=extra-osseous                                                                             | 139564   |
|                                         | #4                             | ALL=clinicopathologic* OR ALL="clinical feature*" OR ALL="clinical characteristic*" OR ALL="clinical outcome*" OR ALL="clinical presentation"                                     | 613009   |
|                                         | #5                             | #1 AND #2 AND #3 AND #4                                                                                                                                                           | 124      |
| <b>Google Scholar [August 24, 2022]</b> |                                |                                                                                                                                                                                   |          |
|                                         | With all of the words          | Ewing sarcoma child clinical                                                                                                                                                      |          |
|                                         | With the exact phrase          |                                                                                                                                                                                   |          |
|                                         | With at least one of the words | extraskeletal "soft tissue"                                                                                                                                                       |          |
|                                         | Total                          | Only the first 200 records were retrieved and screened                                                                                                                            | 200      |
